# Supplementary material for: Strong composite films with layered structures prepared by casting silk fibroin–graphene oxide hydrogels
Source: Royal Society of Chemistry journal article supplement (doi:10.1039/c3nr00196b), 2013-01-01
Supplement: c3nr00196b.pdf [file c3nr00196b.pdf]

**Electronic Supplementary Information (ESI)**

**Nacre-like Strong Composite Films Prepared by Casting Silk  
Fibroin/Graphene Oxide Hydrogels**

**Liang Huang, Chun Li, Wenjing Yuan and Gaoquan Shi\***

*Department of Chemistry, Tsinghua University, Beijing 100084, People's Republic of  
China.*

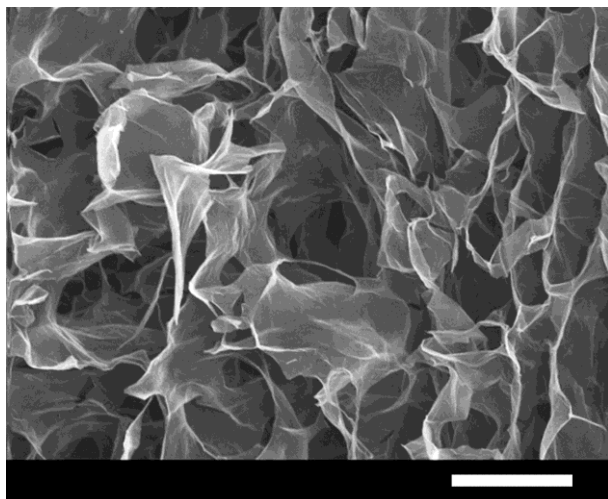

**Fig. S1** SEM image of lyophilized 9 mg mL<sup>-1</sup> GO dispersion. Scale bar = 10 μm.

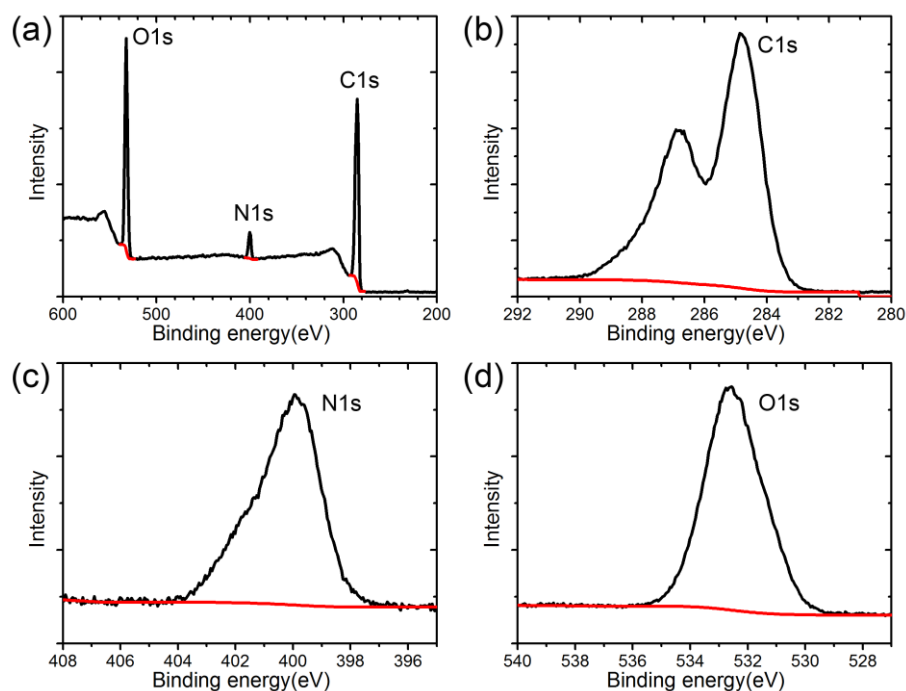

**Fig. S2** (a) XPS spectrum of SF/GO (15 wt%) composite film and the corresponding magnified (b) C1s, (c) N1s, (d) O1s peaks. The red lines are their baselines.

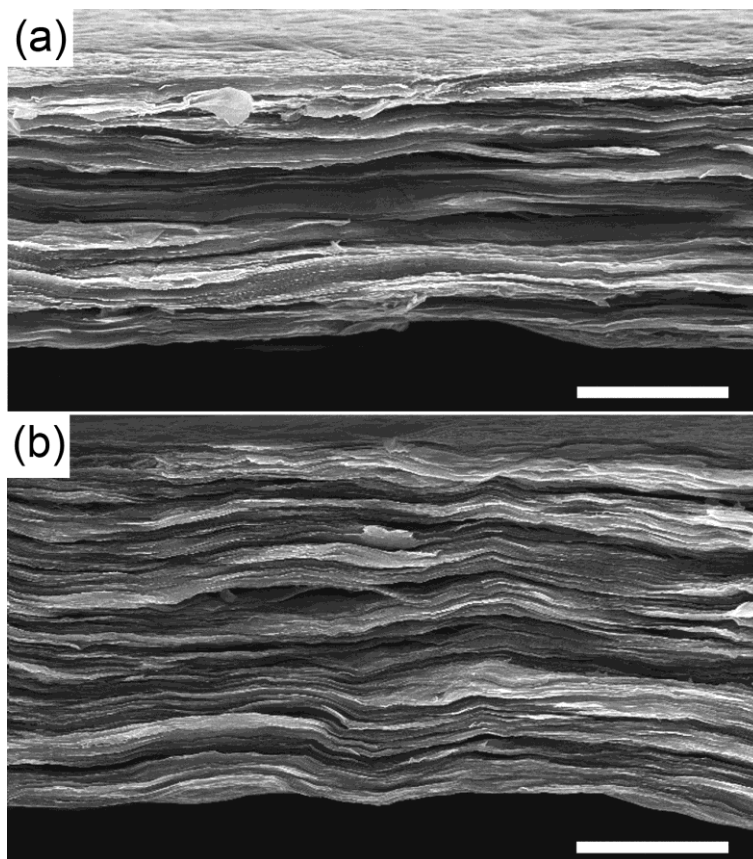

**Fig. S3** SEM images of the failure surfaces of (a) a GO film and (b) a SF/GO composite film containing 15 wt% SF. Scale bar = 5  $\mu\text{m}$ .
